# 1 **Within-subject consistency of paired associative** 2 **stimulation as assessed by linear mixed models.**

3  
4 Myrthe Julia Ottenhoff<sup>a,b</sup>, Lana Fani<sup>a,b</sup>, Nicole Stephanie Erler<sup>c</sup>, Jesminne Castricum<sup>a,b,d</sup>, Imara Fedora  
5 Obdam<sup>d</sup>, Thijs van der Vaart<sup>a,b,e</sup>, Steven Aaron Kushner<sup>b,d</sup>, Marie-Claire Yvette de Wit<sup>b,e</sup>, Ype  
6 Elgersma<sup>b,f\*#</sup>, J.H.M. Tulen<sup>b,g\*#</sup>

7

8 <sup>a</sup> Department of Neuroscience, Erasmus MC, University Medical Center Rotterdam, Rotterdam, The  
9 Netherlands

10 <sup>b</sup> ENCORE Expertise Center for Neurodevelopmental Disorders, Erasmus MC – Sophia Children’s  
11 Hospital, University Medical Center Rotterdam, Rotterdam, The Netherlands

12 <sup>c</sup> Department of Biostatistics, Erasmus MC, University Medical Center Rotterdam, Rotterdam, The  
13 Netherlands

14 <sup>d</sup> Department of Psychiatry, Erasmus MC, University Medical Center Rotterdam, Rotterdam, The  
15 Netherlands

16 <sup>e</sup> Department of Neurology, Erasmus MC, University Medical Center Rotterdam, Rotterdam, The  
17 Netherlands

18 <sup>f</sup> Department of Neuroscience, Erasmus MC, University Medical Center Rotterdam, Rotterdam, The  
19 Netherlands

20 <sup>g</sup> Department of Psychiatry, Erasmus MC, University Medical Center Rotterdam, Rotterdam, The  
21 Netherlands

22

23 \* corresponding authors

24 E-mail: [y.elgersma@erasmusmc.nl](mailto:y.elgersma@erasmusmc.nl); [j.h.m.tulen@erasmusmc.nl](mailto:j.h.m.tulen@erasmusmc.nl)

25

26 # YE and JHMT are joint senior authors.

## Abstract

### 27 Objective

28 Paired associative stimulation (PAS) is a TMS paradigm used to induce long-term potentiation in the  
29 human cortex. Little is known about the within-subject consistency of PAS-induced effects. We  
30 determined PAS-induced effects and their consistency in healthy volunteers between two PAS  
31 sessions. Additionally, we assessed the benefit of applying linear mixed models (LMMs) to PAS data.

32

### 33 Methods

34 Thirty-eight healthy volunteers underwent two identical PAS sessions with a >1 week interval. During  
35 each session, motor evoked potentials (MEPs) were assessed once before PAS induction and 3 times  
36 after at 30 min intervals.

37

### 38 Results

39 We did not detect any significant potentiation of MEP size after PAS induction. However, MEP size  
40 during PAS induction showed significant potentiation over time in both sessions ( $LR(1) = 13.36$ ,  
41  $p < 0.001$ ). Nevertheless, there was poor within-subject consistency of PAS-induced effects both during  
42 (ICC=0.15) and after induction (ICC=0.03-0.08). Additionally, statistical model selection procedures  
43 demonstrate that LMMs are more appropriate than conventional longitudinal models for estimating  
44 PAS-induced effects ( $LR(34) = 214.73$ ,  $p < 0.001$ ).

45

### 46 Conclusion

47 PAS-induced effects are more pronounced during than after induction, have a low within-subject  
48 consistency in any phase of the measurement, and are best estimated with LMMs. The implication of  
49 our study is that PAS is an inappropriate method to assess the evolution of brain plasticity over time  
50 periods longer than the PAS measurement itself.

## 51 **Introduction**

52 Synaptic plasticity is a fundamental process in our central nervous system, because it is essential for  
53 learning and memory [1, 2]. In addition, plasticity deficits are important in the etiology of  
54 neurocognitive disorders [3, 4]. Synaptic plasticity is conventionally measured with invasive  
55 techniques, such as field electrophysiology, which cannot readily be performed in human subjects.  
56 Non-invasive extracranial brain stimulation techniques, such as transcranial magnetic stimulation  
57 (TMS), have emerged in the last two decades, enabling measuring plasticity-like effects in human  
58 subjects. Specific TMS paradigms have been shown to produce long-term potentiation (LTP) as well  
59 as long-term depression (LTD) like effects, resembling the plasticity effects seen using  
60 intraparenchymal electrophysiological studies in animal models.

61  
62 Paired associative stimulation (PAS) is one of the TMS paradigms used to induce long-term plasticity  
63 [5]. PAS is typically applied by pairing median nerve stimulation (MNS) with magnetic stimulation of  
64 the contralateral hand area of the primary motor cortex (M1). Consistent with the fundamental  
65 properties of spike-timing dependent plasticity (STDP) [7], when MNS precedes magnetic  
66 stimulations by 25ms, PAS stimulation induces a long-term increase in excitability of the M1 hand  
67 area that can be observed as an increase of motor-evoked potentials (MEPs) in the contralateral hand.  
68 In contrast, if the MNS precedes the magnetic stimulation by 10ms, the result is a long-term  
69 depression effect [6]. The resemblance to STDP is further strengthened by pharmacological studies  
70 showing that PAS is dependent on the function of the *N*-methyl-D-aspartate (NMDA) receptor, known  
71 to be essential for many forms of long-term synaptic plasticity [7].

72  
73 Because of the temporal similarity of PAS results to classical STDP experiments in rodents, PAS has  
74 emerged as a potentially very useful proxy for studying long-term synaptic plasticity in human  
75 subjects. However, PAS produces highly variable results in humans [8, 9], which is often attributed to  
76 the challenge of achieving similar levels of standardization as for animal experiments. Environmental  
77 factors, lifestyle factors, experimental conditions and even genetic determinants have been suggested

78 to influence the magnitude of the PAS-induced plasticity (for review see Ridding et al. (2010) and  
79 Wischniewski et al. (2016)) [10, 11]. However, these factors only explain between-subject variability,  
80 whereas little is known about the within-subject consistency.

81  
82 Besides inter- and intra-individual variability, PAS studies show variable effect sizes between  
83 laboratories as well [9, 11]. In addition to optimizing experimental procedures, some types of  
84 variability might be possible to account for by appropriate statistical modeling. PAS measurements  
85 generate relatively complex data, combining both repeated measures as well as a nested data structure  
86 (i.e. multiple MEP size assessments per time point). In the last decades, linear mixed models (LMMs)  
87 have emerged as a statistical method that is specifically suited to handle such a data structure, reducing  
88 the chance of both false-positive and false-negative results [12, 13]. Additionally, LMMs are excellent  
89 for estimating reproducibility measures in the form of intra-class correlations. However, the utility of  
90 LMMs for the analysis of PAS data has not yet been demonstrated.

91  
92 In this study, we examined healthy volunteers using two identical PAS sessions with an interval of at  
93 least 1 week, in order to determine the within-subject consistency between the two sessions. Using  
94 linear mixed model (LMM) analyses, we estimated PAS-induced effects and PAS consistency.

95

96

## 97 **Materials and Methods**

### 98 **Subjects**

99 Thirty-eight out of 61 subjects were included in this study (reasons for exclusion are summarized in  
100 Table S1 Table), who were recruited by advertising in the local community and on a Dutch research  
101 subject-recruitment website. Subjects were included if aged 18-40, right-handed according to the  
102 Edinburgh Handedness Inventory [14], in good health, medication free (excluding contraceptives) and  
103 able and willing to give written informed consent. Subjects were excluded if they were women  
104 lactating or pregnant, had a history of psychiatric illness and/or treatment, had a history of

105 neurological illness or did not meet the international safety guidelines considering TMS [15, 16]. All  
106 subjects underwent the Wechsler Abbreviated Scale of Intelligence (WASI) [17] to determine their  
107 intelligence quotient (IQ) [18] for descriptive purposes. This study was approved by the Medical  
108 Ethical Review Board of the Erasmus MC Rotterdam in 2013, requiring study procedures to comply  
109 with the latest version of the Declaration of Helsinki.

110

### 111 **Fig 1. Schematic representation of the PAS paradigm.**

112 (A) Schematic of one PAS session, in which the PAS induction is preceded by a baseline measurement  
113 consisting of 20 TMS stimulations. To measure the change in MEP-size as of PAS induction, this  
114 measurement is repeated 3 times with 30 min intervals. (B) Experimental setup during PAS induction,  
115 where median nerve stimulation (MNS) at 3 times the sensory threshold (ST) precedes transcranial  
116 magnetic stimulations (TMS) delivered at the stimulation intensity 1mV (SI1mV) by 25 ms. Motor  
117 evoked potentials (MEPs) are measured using electromyography (EMG) of the abductis pollicis brevis  
118 muscle. C Example traces of single MEPs before and after PAS induction.

119

## 120 **Electromyography**

121 Muscle activity was recorded from the left abductor pollicis brevis (ABP) muscle with  
122 electromyography (EMG), using Ag-AgCl electrodes in a belly-tendon montage. EMG signals were  
123 amplified using a universal amplifier (ANT Neuro, Enschede, The Netherlands) and digitalized at  
124 5kHz for later offline analysis using Visor2 XT software (ANT Neuro, Enschede, The Netherlands).  
125 During measurements, a continuous EMG signal and trigger related EMG epochs were plotted at real  
126 time for online analysis, while applying a 50Hz notch filter and a 20-2000Hz bandpass filter.

127

## 128 **Transcranial magnetic stimulation**

129 Subjects were invited in the afternoon between 12 and 5.30 PM [19], and were asked to not perform  
130 intense physical activities 24 hours prior to the measurement and to not smoke nicotine cigarettes or  
131 drink coffee on the day of the measurement. They were seated in a comfortable chair with their left

132 arm resting on a pillow and were told to maximally relax their left hand during the measurement.  
133 Magnetic stimulations were applied using a figure-of-eight coil with an inner diameter of 27mm and  
134 outer diameter of 97mm, connected to a MagPro X100 with MagOption TMS device (MagVenture,  
135 Farum, Denmark). The coil was held tangentially to the left primary cortex and diverging 45° from  
136 midline. The electric field subsequently created in the cortex had a posterior to anterior direction.

137  
138 To find the optimal position of the coil in order to maximally activate the ABP (the hotspot), TMS  
139 stimulations were randomly placed around a predefined reference point. This reference point was  
140 defined as the location at 10% of the ear-to-ear span lateral to Cz over the right hemisphere. Data on  
141 coil location and position at every stimulation was collected using a neuronavigation system (ANT  
142 Neuro, Enschede, The Netherlands), allowing a precise spatial definition of the hotspot and precise  
143 determination of the angle and distance errors of every stimulation relative to the hotspot. All TMS  
144 procedures hereafter described are performed at the hotspot.

145  
146 The resting motor threshold (RMT) was determined using a maximum-likelihood threshold hunting  
147 procedure [20]. For this procedure, a MEP with a peak-to-peak amplitude of  $\geq 50\mu\text{V}$  with an onset  
148 within a timeframe of 20-50ms post stimulation was considered a MEP. Subsequently, the stimulation  
149 intensity 1mV (SI1mV) was determined, defined as the percentage of maximal stimulation output  
150 (%MSO) of the TMS device that resulted in a mean MEP of 0.8 - 1.2 mV after 10 stimulations at  
151 0.1Hz.

152

## 153 **Paired associative stimulation**

154 Subjects underwent two identical paired associative stimulation (PAS) sessions at least one week  
155 apart. First, baseline cortical excitability was assessed by applying a train of 20 magnetic stimulations  
156 at the SI1mV at 0.1Hz. Second, the PAS induction phase followed, consisting of 200 paired  
157 stimulations at 0.25Hz with each pair consisting of electric MNS followed by magnetic stimulation  
158 with an inter stimulus interval of 25ms. Third, after this plasticity induction phase, the cortical

159 excitability measurement at baseline was repeated at three time points: immediately (Post 1), 30  
160 minutes (Post 2), and 60 minutes (Post 3) after completing PAS induction (Fig 1B).

161

162 MNS during the PAS-induction was applied with a strength of three times the sensory threshold, using  
163 a bipolar bar electrode connected to a constant current stimulator (model DS7A; Digitimer Ltd.,  
164 Letchworth Garden City, UK) (Fig 1A). In case this stimulation intensity surpassed the pain threshold,  
165 it was lowered to a painless but clearly noticeable level. The subject's attention level was standardized  
166 as much as possible by applying four randomly timed electric stimuli during PAS induction to the  
167 middle phalanx of the left thumb, and instructing participants upfront of PAS induction to focus their  
168 attention on their left thumb, to count the number of thumb stimuli sensed and to report this number  
169 after PAS induction [21]. These electric stimulations were administered at two times the sensory  
170 threshold using a double ring electrode connected to a constant current stimulator (Micromed S.p.A,  
171 Mogliano Veneto, Italy).

172

## 173 **MEP-analysis**

174 The EMG signal for every magnetic stimulation applied was stored for offline analysis as epochs of -  
175 300ms to +300ms surrounding the TMS trigger (Fig 1C). Using software programmed in LabVIEW  
176 (National Instruments, Austin, TX, US) pre-MEP noise, the maximal peak-to-peak amplitude and  
177 MEP onset were determined using a seven-step data processing procedure:

- 178 1. Signals were linearly detrended.
- 179 2. The average amplitude value of the -300ms to -20ms before the TMS trigger was subtracted  
180 to create a zero-baseline.
- 181 3. To prevent ringing due to filtering, the stimulation artefact was removed between -2ms to  
182 +4ms surrounding the TMS trigger, followed by linear interpolation. For MEPs obtained  
183 during PAS induction, the stimulation artefact of the MNS was removed similarly.
- 184 4. Signals were filtered using both a 20-2000Hz bandpass filter and a 50Hz-notch filter.

- 185 5. Noise was determined on a time window of -25ms to +15ms surrounding the TMS trigger  
186 that was depleted of baseline wandering by subtracting a 2<sup>nd</sup>-order polynomial fit. It was  
187 defined as a peak-to-peak amplitude of >50 $\mu$ V or an SD of >15. Signals meeting these criteria  
188 were discarded for further statistical analysis.
- 189 6. The maximal peak-to-peak amplitude of every MEP was determined within a 20-48ms time  
190 frame following the TMS trigger.
- 191 7. The MEP onset was determined within an 18-30ms time frame following the TMS trigger.

192

## 193 **Statistical analysis**

194 Statistical analyses were performed using R version 3.3.3 [22] and the nlme package for mixed model  
195 analysis specifically [23]. Session specific subject characteristics were compared using paired t-tests  
196 for normally distributed data (RMT and SI1mV), a Wilcoxon Signed Rank test for non-normal  
197 continuous data (starting time of TMS measurement), a Chi-square test for categorical data (attention  
198 score) and LMMs for data related to individual MEPs (angle and distance error). Furthermore, we  
199 used LMMs to estimate PAS-induced changes of MEP size, their correlations with baseline MEP size,  
200 and intraclass correlations (ICCs). For these LMMs, the dependent variable was MEP size, which was  
201 log<sub>2</sub>-transformed to better fit the assumption of normally distributed residuals. In addition, these  
202 LMMs were adjusted for log<sub>2</sub>-transformed angle and distance error.

203

204 We built Model 1 to estimate PAS-induced effects on MEP size at each time point *after induction*  
205 (Post 1, Post 2 and Post 3) within each session. This LMM included time point (categorical), session,  
206 and their interaction. The random effects included subject specific random effects for each time point  
207 in each session separately. An unstructured covariance matrix for the random effects was used (Model  
208 1a) and was tested against the more restrictive compound symmetry structure (Model 1b), using a  
209 likelihood ratio (LR) test. Subsequently, the LR test was also used to assess the main effects of fixed  
210 effects.

211



212 Model 2 was built to estimate PAS-induced effects *during PAS induction*. This LMM included  
213 stimulus number (continuous), session and their interaction. Stimulus number was regarded as  
214 continuous time variable, as stimulations were equally spaced by 4 seconds in all PAS experiments.  
215 The model included subject specific random effects for stimulus number and session interaction and  
216 session. The eventual model was selected in three steps using likelihood ratio tests. First, we started  
217 out with a model using both natural cubic splines for stimulus number with three degrees of freedom  
218 and an unstructured covariance matrix (Model 2a). Second, to investigate the correlation structure, we  
219 tested Model 2a against a model with a compound symmetry structure (Model 2b). Last, to test  
220 whether the relation between MEP size and stimulus number was non-linear, Model 2a was tested  
221 against a model with a linear fit (Model 2c), using a LR test. After model selection, the LR test was  
222 also used to determine the main effects of fixed effects.

223

224 As a measure of within-subject consistency we calculated ICCs from LMMs that included session as  
225 an additional nesting level in the random effects. For the ICC of PAS-induced effects after induction,  
226 fixed effects and subject specific random effects of time point (categorical) were used (Model 3). To  
227 estimate the ICC of PAS-induced effects during PAS-induction over time, fixed effects as well as  
228 subject specific slopes for stimulus number (continuous time variable) were included (Model 4). Since  
229 the models used to calculate ICCs contained random effects for the respective time variables, the  
230 variation partition method was used [24]. 95% confidence intervals (95% CIs) for each ICC were  
231 estimated using 500 bootstrap samples.

232

233

## 234 **Results**

### 235 **Session characteristics**

236 Thirty-eight individuals (22 women; median age 23, range 19-38; mean IQ 107±10SD) underwent two  
237 PAS sessions, which were spaced at least 1 week apart (median days between sessions was 14, IQR:  
238 4). As displayed in Table 1, median starting time was significantly earlier in session 1 than in session

239 2, whereas both sessions did not differ in terms of baseline RMT, SII<sub>mV</sub> or the level of attention  
 240 during PAS induction. Additionally, the angle error and distance error relative to the hotspot did not  
 241 differ between sessions either. The estimated means of both errors over each time point were minimal,  
 242 with the upper limit of the 95% CIs not exceeding 5° for the angle error and 2mm for the distance  
 243 error. There was, however, a significant effect of time point (including PAS induction) on both angle  
 244 error (LR(8) = 22.41, p = 0.004) and distance error (LR(8) = 18.55, p = 0.018).  
 245

**Table 1. Session characteristics and comparisons.**

| Characteristic                                | Session 1           | Session 2           | Statistic      | P-value |
|-----------------------------------------------|---------------------|---------------------|----------------|---------|
| RMT at baseline, mean (±SD), %MSO             | 48.5 (±10.3)        | 48.3 (±9.1)         | t(37) = 0.17   | 0.87    |
| SII <sub>mV</sub> , %MSO                      | 61.4 (±14.4)        | 60.1 (±14.7)        | t(37) = 1.10   | 0.28    |
| Start time, median (IQR), hh:mm               | 12:44 (12:28-13:08) | 15:23 (15:00-15:41) | Z=719          | <0.0001 |
| Attention score, n (%)                        |                     |                     | LR(2) = 3.74   | 0.15    |
| <4 stimuli reported                           | 10 (29)             | 14 (38)             |                |         |
| 4 stimuli reported                            | 10 (29)             | 15 (41)             |                |         |
| >4 stimuli reported                           | 15 (43)             | 8 (22)              |                |         |
| Angle error, estimated mean [95%CI]*, degrees |                     |                     | LR(5) = 5.26** | 0.39    |
| Baseline                                      | 2.69 [1.75, 4.16]   | 1.67 [1.11, 2.51]   |                |         |
| Induction                                     | 2.95 [1.99, 4.35]   | 2.11 [1.47, 3.01]   |                |         |
| Post1                                         | 2.07 [1.39, 3.08]   | 1.86 [1.12, 3.08]   |                |         |
| Post2                                         | 2.23 [1.41, 3.54]   | 1.29 [0.89, 1.87]   |                |         |
| Post3                                         | 1.83 [1.15, 2.91]   | 1.09 [0.81, 1.46]   |                |         |
| Distance error, estimated mean [95%CI]*, mm   |                     |                     | LR(5) = 3.85** | 0.57    |
| Baseline                                      | 1.01 [0.84, 1.23]   | 0.87 [0.68, 1.12]   |                |         |
| Induction                                     | 1.11 [0.95, 1.29]   | 0.91 [0.79, 1.04]   |                |         |
| Post1                                         | 1.10 [0.97, 1.26]   | 0.91 [0.79, 1.06]   |                |         |
| Post2                                         | 1.20 [0.96, 1.50]   | 1.30 [1.02, 1.65]   |                |         |

|                                                                                                                                               |                   |                   |
|-----------------------------------------------------------------------------------------------------------------------------------------------|-------------------|-------------------|
| Post3                                                                                                                                         | 1.31 [1.02, 1.68] | 1.34 [1.03, 1.74] |
| * Estimated using a LMM with the log2 transformed error as dependent variable and time point, session and their interaction as fixed effects. |                   |                   |
| ** Main effect of session estimated by comparing LMMs using a likelihood ratio test                                                           |                   |                   |

246

## 247 PAS-induced effects post induction

248 We determined the PAS-induced effect on MEP size at each post-induction measurement in each  
249 session. After filtering out MEPs with a noisy baseline, 5212 MEPs out of the originally 6080 MEPs  
250 recorded could be used for statistical analysis, resulting in the exclusion of one complete session of  
251 one subject. Plotting the individual trajectories of MEP size after induction (Fig 2A) indicates that  
252 PAS-induced changes of MEP size were highly variable. It is, therefore, not surprising that a model  
253 with an unstructured covariance matrix provided a better fit than one with a compound symmetry  
254 matrix (LR(34) = 214.73,  $p < 0.001$ ), and was therefore selected as the appropriate matrix to estimate  
255 PAS-induced effects in our data.

256

257 The estimated mean of baseline MEP size of session 1 (0.54 mV; 95%CI [0.43, 0.68]) did not differ  
258 from that of session 2 (0.61 mV; 95%CI [0.53, 0.71]) (LR(4)=2.26,  $p=0.689$ ). MEP size changed  
259 significantly over time (LR(6) = 16.23;  $p = 0.013$ ), which was mainly driven by a negative effect on  
260 MEP size in Post 3 in session 2 (Table 2), instead of a positive effect on MEP size as one would  
261 expect when performing PAS. PAS-induced effects did not differ between sessions, as the interaction  
262 between time point and session was not significant (LR(3) = 1.93;  $p=0.586$ ). The absence of this  
263 interaction is reflected by the similar profile of MEP size over time illustrated in Fig 2B. There was a  
264 moderate positive correlation between individual baseline MEP size and the PAS-induced effect at  
265 each time point in session 1 ( $r_{\text{Post 1}} = 0.68$ ,  $r_{\text{Post 2}} = 0.57$ ,  $r_{\text{Post 3}} = 0.52$ ) and a poor positive correlation in  
266 session 2 ( $r_{\text{Post 1}} = 0.23$ ,  $r_{\text{Post 2}} = 0.21$ ,  $r_{\text{Post 3}} = 0.30$ ).

267

**Table 2. Fixed effects of PAS induction on MEP size per post-induction time point and session estimated by linear mixed effect modelling.**

| Session 1 | Session 2 |
|-----------|-----------|
|-----------|-----------|

| Variable | $\beta$ , % | 95%CI, %        | t (5165) | P-value | $\beta$ , % | 95%CI, %         | t (5165) | P-value |
|----------|-------------|-----------------|----------|---------|-------------|------------------|----------|---------|
| Post 1   | +16.83      | [-9.05, 50.07]  | 1.22     | 0.22    | -3.99       | [-26.58, 25.55]  | -0.30    | 0.77    |
| Post 2   | -10.00      | [-30.92, 17.24] | -0.78    | 0.43    | -23.92      | [-42.44, 0.55]   | -1.92    | 0.05    |
| Post 3   | -14.84      | [-35.65, 12.69] | -1.12    | 0.26    | -31.65      | [-47.92, -10.30] | -2.74    | 0.006   |

268

269

## 270 **Fig 2. PAS-induced effects for session 1 and 2 separately.**

271 Subjects underwent two identical PAS sessions spaced >1 week apart, with session 1 displayed in red  
272 and session 2 in blue. (A) The mean change in MEP size over time per session (black line) plotted  
273 over the individual line plots (colored lines). (B) The mean change in MEP size over time for both  
274 sessions, where dots represent means of individual medians and bars represent their standard error. (C)  
275 Linear regression lines through all MEPs during PAS induction per session (black lines) plotted over  
276 the linear regression lines through MEPs per individual (colored lines). (D) The change of MEP size  
277 over time during the PAS induction, with every dot representing the mean MEP size over all  
278 participants for that stimulation number. Lines are fitted linear regression lines per session.

279

## 280 **Potentiation during PAS induction**

281 We, additionally, took a novel approach to determine the PAS-induced effect on MEP size by  
282 assessing this effect during PAS induction next to post induction alone. For this analysis, 9360 MEPs  
283 were available out of the 15200 MEPs recorded, due to filtering out MEPs with a noisy baseline. The  
284 exclusion of these MEPs resulted in the exclusion of one entire session for 9 subjects and the  
285 exclusion of both sessions for 4 subjects. Viewing the individual trajectories of MEP size development  
286 again indicates that there was high inter-individual variability (Fig 2C), which is reflected by the  
287 superior fit of the model with an unstructured covariance matrix to one with a compound symmetry  
288 covariance matrix (LR(8) = 525.31,  $p < 0.001$ ). The development of MEP size over time appeared to  
289 be linear (Fig 2D), supported by the fact that a model with a cubic fit was not superior to one with a  
290 linear fit (LR(4) = 2.69,  $p = 0.612$ ). Therefore, a model with an unstructured covariance matrix and a  
291 linear fit was selected as the appropriate model to estimate PAS-induced effects.

292

293 The estimated mean of MEP size at the start of PAS induction in session 1 (0.43 mV, 95%CI [0.27,  
294 0.59]) did not differ from that in session 2 (0.44 mV, 95%CI [0.29, 0.66]) (LR(2) = 0.967,  $p = 0.617$ ).  
295 There was a main effect of time (LR(1) = 13.36,  $p < 0.001$ ), as a result of a significant positive  
296 increase of MEP size over time in both session 1 (+132%, 95%CI [+51%, +258%]) and session 2  
297 (+79%, 95%CI [+19%, +169%]). However, there was no evidence of this time effect being different  
298 between sessions (LR(1) = 0.87,  $p = 0.35$ ), reflected by the similar slope of the MEP size development  
299 in Fig 2D. There was a moderate negative correlation between MEP size at the start of PAS induction  
300 and the change in MEP size over time for session 1 ( $r = -0.51$ ) and a weak negative correlation for  
301 session 2 ( $r = -0.41$ ).

302

### 303 **Consistency of PAS-induced effects**

304 The within subject consistency of PAS-induced effects between the two sessions was small: Post 1 had  
305 an ICC of 0.08 (95%CI [0.03, 0.16]); Post 2 had an ICC of 0.07 (95%CI [0.03, 0.14]); and Post 3 had  
306 an ICC of 0.03 (95%CI [0.01, 0.09]) (Fig 3). Furthermore, the PAS-induced effects during induction  
307 showed a similarly poor within-subject consistency (ICC = 0.15; 95%CI [0.05, 0.35]) (Fig 3), despite  
308 their significant potentiation at group level. The ICC of baseline MEP size before induction was poor  
309 (ICC = 0.02; 95%CI [ $<0.01$ , 0.04]), as well as at the start of PAS induction (ICC = 0.24; 95%CI =  
310 [0.04, 0.42]). Nonetheless, the SI1mV did have a good within-subject consistency (ICC = 0.88; 95%CI  
311 [0.83, 0.96]), as did the RMT at different time points (ICC<sub>Baseline</sub> = 0.85, 95%CI [0.77, 0.92]; ICC<sub>Post 1</sub>  
312 = 0.83, 95%CI [0.79, 0.90]; ICC<sub>Post 2</sub> = 0.85, 95%CI = [0.79, 0.92]; ICC<sub>Post 3</sub> = 0.85, 95%CI [0.78,  
313 0.92]).

314

### 315 **Fig 3. Intra-individual correlation of PAS-induced effects.**

316 Scatterplots per phase during or after induction illustrating the correlation between individual PAS-  
317 induced effects (dashed slopes) of session 1 against session 2. The slopes plotted are derived from the  
318 models used to calculate the ICC of PAS-induced effects within subject and between session.

319

320

## 321 **Discussion**

322 To our knowledge, we performed the largest study reported to date aimed at quantifying the within-  
323 subject consistency of PAS-induced effects. Additionally, this is the first PAS-TMS study that  
324 quantifies the change in MEP size during PAS induction over time and the first using a linear mixed  
325 model analysis approach. We performed two identical PAS sessions in one group of healthy  
326 volunteers, resulting in pronounced potentiation over time during PAS induction, which was not  
327 consistent within subjects. PAS-effects after induction did not show the expected potentiation, and  
328 these effects were not consistent within subjects either. Additionally, we demonstrated that a linear  
329 mixed model with an unstructured covariance matrix provides the best model fit for our PAS data.

330

### 331 **PAS-induced effects during and after induction**

332 The absence of post-induction potentiation in our study, and even the negative trend towards the last  
333 post-induction measurement, is certainly not in line with most PAS studies (for review see [11]), for  
334 which a few factors in our study could be responsible. First, our baseline MEP size is lower than the  
335 baseline of around 1mV shown in most PAS studies. In addition, we found a poor to moderate positive  
336 correlation between baseline MEP size and the PAS induced effects at each post-induction time point,  
337 suggesting that individuals with a low baseline were prone to show lower PAS-induced effects.  
338 Combined, these two observations could indicate that our stimulation intensity during induction was  
339 relatively lower than most PAS studies, possibly causing our PAS-induced effects to be smaller.  
340 Nonetheless, this hypothetical interaction between stimulation intensity and potentiation effect has  
341 never been specifically studied and relatively lower stimulation intensities that are still supra-threshold  
342 should still be able to potentiate MEP size, as double activation of the cortex by TMS and MNS is  
343 conserved. Second, coil placement during experiments could have been inaccurate. However, as angle  
344 and distance error of the coil position relative to the hotspot were minimal and carefully corrected for  
345 in our model, this is unlikely the case in our study. Last, the known compromising effect of sleepiness

346 on MEP size could be a contributor [25]. As our subjects remained seated and were not allowed to  
347 perform any type of physical activity or specific types of mental activity between post-induction time  
348 points, it is plausible that subjects became increasingly sleepy during this phase of the experiment.  
349 Unfortunately, we cannot support this speculation with actual measures of sleepiness during  
350 experiments, as these were not assessed.

351  
352 Nevertheless, we did find a significant increase of MEP size during PAS induction that shows striking  
353 resemblance to the increase in excitatory post synaptic potentials seen in STDP experiments in rodents  
354 [26]. From these animal studies, we know that the potentiation during plasticity induction correlates  
355 with the potentiation after induction. However, whether our observed potentiation of MEP size during  
356 PAS induction is indeed a proxy for NMDA-dependent LTP as well, should be confirmed by studies  
357 using a sham-stimulation control and preferably also placebo-controlled studies with an NMDA-  
358 receptor antagonist. It is noteworthy, however, that in our study MEP size at the start of PAS induction  
359 showed a negative correlation with PAS-induced effects during PAS induction. As MNS during paired  
360 stimulations has a known acute inhibitory effect on MEP size, also known as short-latency afferent  
361 inhibition [27, 28], lower MEP size at the start of induction could indicate successful paired  
362 stimulations and, therefore, be related to a more prominent PAS-induced potentiation.

363

## 364 **The advantage of using linear mixed models for PAS data**

365 Our results provide insight in the potential advantage of LMMs for analyzing PAS data over  
366 conventional analysis methods. Most importantly, we show that using an unstructured covariance  
367 matrix provides a better model fit than using a compound symmetry matrix. First, our finding at least  
368 demonstrates that PAS data can greatly benefit from a model of which the covariance matrix can be  
369 flexibly designed and suggests that the compound symmetry matrix is unsuited for PAS data. As the  
370 compound symmetry assumes that the correlations of MEP size between each time point are equal,  
371 this result is actually not surprising for data sampled in a dynamic biological system such as the  
372 human brain. Since conventionally used RM-ANOVA is restricted to a compound symmetry matrix,

373 LMMs are therefore more appropriate for the analysis of PAS data and are likely to deliver more  
374 reliable results. Consequently, future consistent implementation of LMMs for analyzing PAS data will  
375 improve the reproducibility between PAS studies.

376

## 377 **Consistency of PAS-induced effects**

378 We show that PAS-induced effects, both during and after PAS induction, have poor intra-individual  
379 consistency. However, one could argue that the lack of significant post-induction potentiation  
380 compromises the validity of the consistency levels in this study. Nonetheless, we were able to show  
381 significant potentiation during induction, which showed similar low consistency. Additionally, a lack  
382 of significant potentiation at group level does not warrant that at individual level, as can be  
383 appreciated from the individual traces in Fig 2A, and the low consistency found in this study indicates  
384 that the subset of individuals showing potentiation were largely different in each session. It is,  
385 therefore, unlikely that the consistency would be much higher in case of significant potentiation at  
386 group level, which is in line with previous results reported by Fratello et al. (2006): in their study, they  
387 also performed two identical PAS sessions within one group of healthy volunteers (n=18) and found  
388 equally poor intra-individual consistency, despite finding significant PAS-induced potentiation both  
389 PAS sessions [29].

390

391 The low consistency of PAS does not seem to hold for methods that measure brain plasticity in  
392 humans in general, as intermittent theta burst stimulation (iTBS) was found to produce reasonably  
393 consistent measures of brain plasticity with an ICC of 0.53 [30]. Another paradigm, anodal  
394 transcranial direct current stimulation (aTDCS), showed moderate to no intra-individual consistency in  
395 two separate studies [31, 32]. The contrast between the within-subject consistency between iTBS and  
396 PAS can be understood from animal studies, suggesting that plasticity induction protocols based on  
397 low frequency stimulations, such as STDP, are much more vulnerable to metaplasticity than high  
398 frequency paradigms such as theta burst stimulation [33]. This is in line with findings in human TMS  
399 studies, also reporting a vulnerability of PAS to metaplasticity [34, 35]. Altogether, this implies that



400 PAS is probably much more dependent on highly dynamic time-varying factors than iTBS, resulting in  
401 a lower within-subject consistency of PAS.

402

403 In our view, the inconsistency of PAS-induced plasticity has major implications for its use. As our  
404 results have revealed that PAS-induced effects cannot be seen as a trait, dividing subjects into PAS  
405 responders and PAS non-responders or even selecting subjects based on previous PAS results seems  
406 generally unsuitable. Moreover, our results suggest that PAS has limited value in longitudinal studies,  
407 for example, in studies monitoring drug effects over longer periods of time or in patient follow-up  
408 studies characterizing disease progression.

409

## 410 **Conclusion**

411 Our results demonstrate that PAS-induced effects have a high intra-individual variability and that  
412 PAS-induced potentiation of MEP size seems to be most pronounced at the end of the induction phase  
413 opposed to after induction. Additionally, our results support the use of LMMs for analyzing PAS data.  
414 The main implication of our results is that, due to its low consistency, PAS is unsuitable to track the  
415 development of human brain plasticity over longer periods of time.

416

## 417 **Acknowledgements**

418 We thank Dr. D. Rizopoulos for his helpful statistical advice, Dr. H.J. Boele for helping with  
419 developing the signal analysis software, Dr. H.G. van Steenis for technical support, and T. van Essen  
420 and D. Mani for their help preparing the data for signal analysis.

421

422

## 423 **References**

424 1. Caroni P, Donato F, Muller D. Structural plasticity upon learning: regulation and  
425 functions. *Nat Rev Neurosci*. 2012;13(7):478-90.

- 426 2. Caroni P, Chowdhury A, Lahr M. Synapse rearrangements upon learning: from  
427 divergent-sparse connectivity to dedicated sub-circuits. *Trends Neurosci.* 2014;37(10):604-14.
- 428 3. Klyubin I, Ondrejcek T, Hayes J, Cullen WK, Mably AJ, Walsh DM, et al.  
429 Neurotransmitter receptor and time dependence of the synaptic plasticity disrupting actions of  
430 Alzheimer's disease Abeta in vivo. *Philos Trans R Soc Lond B Biol Sci.*  
431 2014;369(1633):20130147.
- 432 4. Srivastava AK, Schwartz CE. Intellectual disability and autism spectrum disorders:  
433 causal genes and molecular mechanisms. *Neurosci Biobehav Rev.* 2014;46 Pt 2:161-74.
- 434 5. Stefan K, Kunesch E, Cohen LG, Benecke R, Classen J. Induction of plasticity in the  
435 human motor cortex by paired associative stimulation. *Brain.* 2000;123 Pt 3:572-84.
- 436 6. Wolters A, Sandbrink F, Schlottmann A, Kunesch E, Stefan K, Cohen LG, et al. A  
437 temporally asymmetric Hebbian rule governing plasticity in the human motor cortex. *J*  
438 *Neurophysiol.* 2003;89(5):2339-45.
- 439 7. Stefan K, Kunesch E, Benecke R, Cohen LG, Classen J. Mechanisms of enhancement  
440 of human motor cortex excitability induced by interventional paired associative stimulation. *J*  
441 *Physiol.* 2002;543(Pt 2):699-708.
- 442 8. Wischnewski M, Schutter DJ. Efficacy and time course of paired associative  
443 stimulation in cortical plasticity: Implications for neuropsychiatry. *Clin Neurophysiol.*  
444 2016;127(1):732-9.
- 445 9. Lahr J, Passmann S, List J, Vach W, Floel A, Kloppe S. Effects of Different Analysis  
446 Strategies on Paired Associative Stimulation. A Pooled Data Analysis from Three Research  
447 Labs. *PLoS One.* 2016;11(5):e0154880.
- 448 10. Ridding MC, Ziemann U. Determinants of the induction of cortical plasticity by non-  
449 invasive brain stimulation in healthy subjects. *The Journal of physiology.* 2010;588(Pt  
450 13):2291-304.
- 451 11. Wischnewski M, Schutter DJLG. Efficacy and time course of paired associative  
452 stimulation in cortical plasticity: Implications for neuropsychiatry. *Clinical Neurophysiology.*  
453 2016;127(1):732-9.
- 454 12. Aarts E, Dolan CV, Verhage M, van der Sluis S. Multilevel analysis quantifies  
455 variation in the experimental effect while optimizing power and preventing false positives.  
456 *BMC Neurosci.* 2015;16(1):94-.
- 457 13. Aarts E, Verhage M, Veenvliet JV, Dolan CV, van der Sluis S. A solution to  
458 dependency: using multilevel analysis to accommodate nested data. *Nature neuroscience.*  
459 2014;17(4):491-6.
- 460 14. Oldfield RC. The assessment and analysis of handedness: the Edinburgh inventory.  
461 *Neuropsychologia.* 1971;9(1):97-113.
- 462 15. Rossi S, Hallett M, Rossini PM, Pascual-Leone A, Safety of TMS/CG. Safety, ethical  
463 considerations, and application guidelines for the use of transcranial magnetic stimulation in  
464 clinical practice and research. *Clin Neurophysiol.* 2009;120(12):2008-39.
- 465 16. Rossi S, Hallett M, Rossini PM, Pascual-Leone A. Screening questionnaire before  
466 TMS: an update. *Clin Neurophysiol.* 2011;122(8):1686.
- 467 17. Wechsler D. Wechsler Abbreviated Scale of Intelligence. San Antonio, TX:  
468 Psychological Corporation; 1999.
- 469 18. Axelrod BN. Validity of the Wechsler abbreviated scale of intelligence and other very  
470 short forms of estimating intellectual functioning. *Assessment.* 2002;9(1):17-23.
- 471 19. Sale MV, Ridding MC, Nordstrom MA. Factors influencing the magnitude and  
472 reproducibility of corticomotor excitability changes induced by paired associative stimulation.  
473 *Exp Brain Res.* 2007;181(4):615-26.
- 474 20. Awiszus F. TMS and threshold hunting. *Suppl Clin Neurophysiol.* 2003;56:13-23.

- 475 21. Stefan K, Wycislo M, Classen J. Modulation of associative human motor cortical  
476 plasticity by attention. *J Neurophysiol.* 2004;92(1):66-72.
- 477 22. R Development Core Team. Vienna, Austria: R Foundation for Statistical Computing;  
478 2017.
- 479 23. Pinheiro J BD, DebRoy S, Sarkar D and R Core Team. *nlme: Linear and Nonlinear*  
480 *Mixed Effects Models.* 2017.
- 481 24. Goldstein H, Browne W, Rasbash J. Partitioning Variation in Multilevel Models.  
482 *Understanding Statistics.* 2002;1(4):223-31.
- 483 25. Manganotti P, Fuggetta G, Fiaschi A. Changes of motor cortical excitability in human  
484 subjects from wakefulness to early stages of sleep: A combined transcranial magnetic  
485 stimulation and electroencephalographic study. *Neuroscience Letters.* 2004;362(1):31-4.
- 486 26. Froemke RC, Debanne D, Bi G-Q. Temporal modulation of spike-timing-dependent  
487 plasticity. *Frontiers in synaptic neuroscience.* 2010;2(June):19-.
- 488 27. Tokimura H, Di Lazzaro V, Tokimura Y, Oliviero A, Profice P, Insola A, et al. Short  
489 latency inhibition of human hand motor cortex by somatosensory input from the hand. *J*  
490 *Physiol.* 2000;523 Pt 2:503-13.
- 491 28. Turco CV, El-Sayes J, Savoie MJ, Fassett HJ, Locke MB, Nelson AJ. Short- and long-  
492 latency afferent inhibition; uses, mechanisms and influencing factors. *Brain Stimul.*  
493 2018;11(1):59-74.
- 494 29. Fratello F, Veniero D, Curcio G, Ferrara M, Marzano C, Moroni F, et al. Modulation  
495 of corticospinal excitability by paired associative stimulation: reproducibility of effects and  
496 intraindividual reliability. *Clinical neurophysiology : official journal of the International*  
497 *Federation of Clinical Neurophysiology.* 2006;117(12):2667-74.
- 498 30. Hinder MR, Goss EL, Fujiyama H, Canty AJ, Garry MI, Rodger J, et al. Inter- and  
499 intra-individual variability following intermittent theta burst stimulation: Implications for  
500 rehabilitation and recovery. *Brain Stimulation.* 2014;7(3):365-71.
- 501 31. Lopez-Alonso V, Fernandez-Del-Olmo M, Costantini A, Gonzalez-Henriquez JJ,  
502 Cheeran B. Intra-individual variability in the response to anodal transcranial direct current  
503 stimulation. *Clin Neurophysiol.* 2015;126(12):2342-7.
- 504 32. Chew T, Ho K-A, Loo CK. Inter- and intra-individual variability in response to  
505 transcranial direct current stimulation (tDCS) at varying current intensities. *Brain Stimulation.*  
506 2015;8(6):1130-7.
- 507 33. Zhang L. Hippocampal Synaptic Metaplasticity Requires Inhibitory  
508 Autophosphorylation of Ca<sup>2+</sup>/Calmodulin-Dependent Kinase II. *Journal of Neuroscience.*  
509 2005;25(33):7697-707.
- 510 34. Delvendahl I, Jung NH, Mainberger F, Kuhnke NG, Cronjaeger M, Mall V. Occlusion  
511 of bidirectional plasticity by preceding low-frequency stimulation in the human motor cortex.  
512 *Clin Neurophysiol.* 2010;121(4):594-602.
- 513 35. Muller JF, Orekhov Y, Liu Y, Ziemann U. Homeostatic plasticity in human motor  
514 cortex demonstrated by two consecutive sessions of paired associative stimulation. *Eur J*  
515 *Neurosci.* 2007;25(11):3461-8.
- 516

517

## 518 **Supporting Information**

519 **S1 Table. Reasons for excluding recruited individuals before entering the study.**

520 **S1 Dataset. Full dataset of all variables reported.** RDA-file containing all data on all variables  
521 reported in this manuscript. This file can be opened and used with the open source R or RStudio  
522 software [22].

523 **S1 Syntax. Syntax for all linear mixed models reported.** Syntax written in the R-language,  
524 containing all linear mixed models that are used to generate results for this manuscript. This file can  
525 be opened and used with the open source R or RStudio software [22].

**A**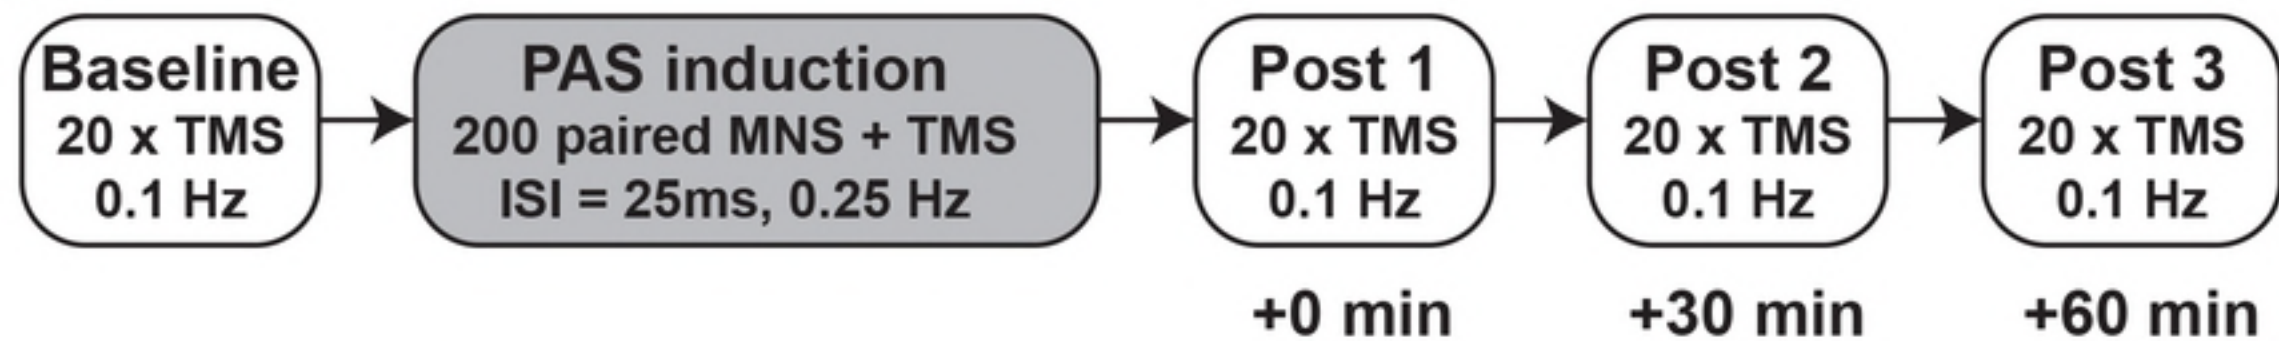**B**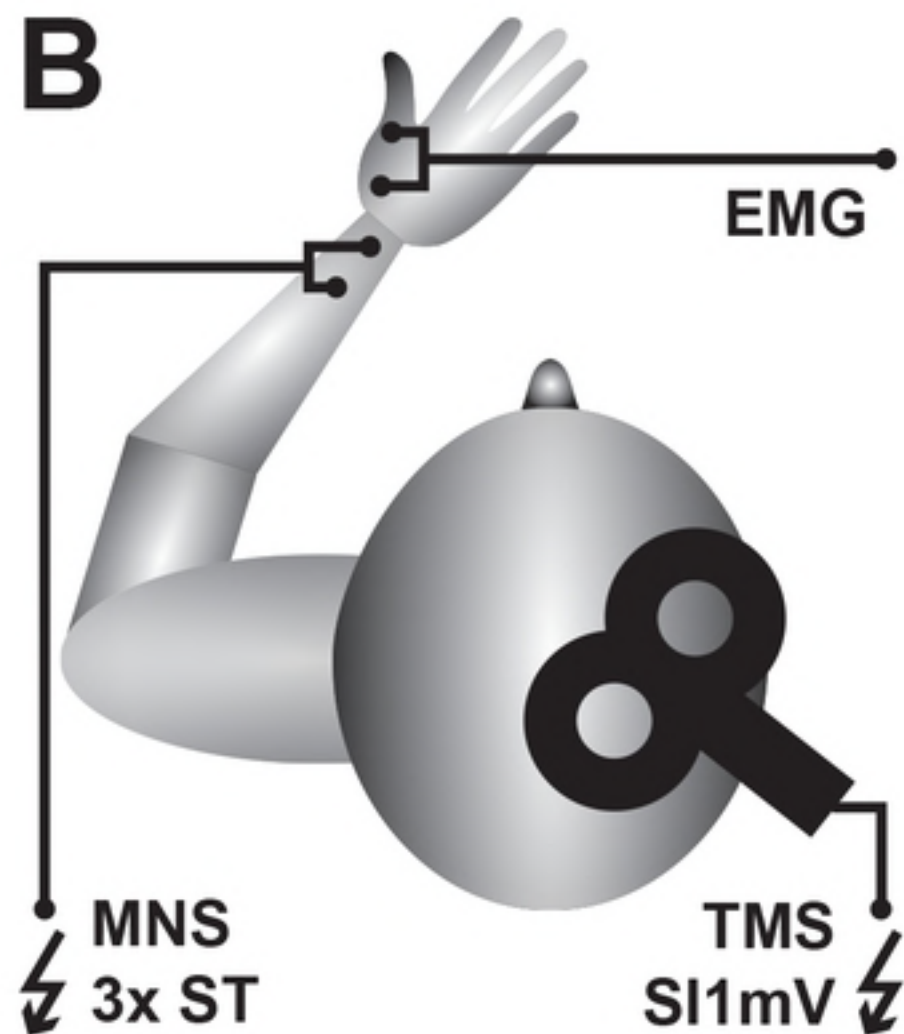**C**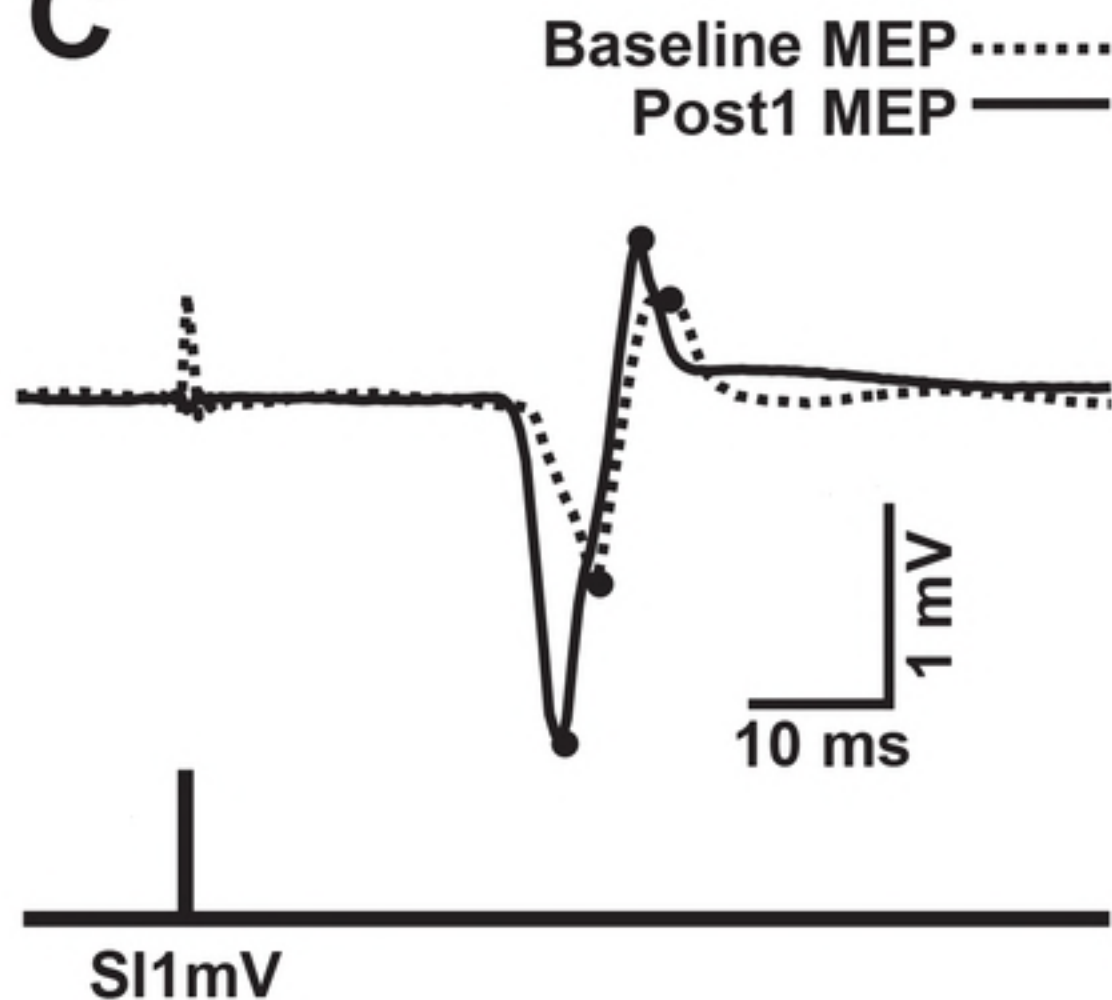

**A**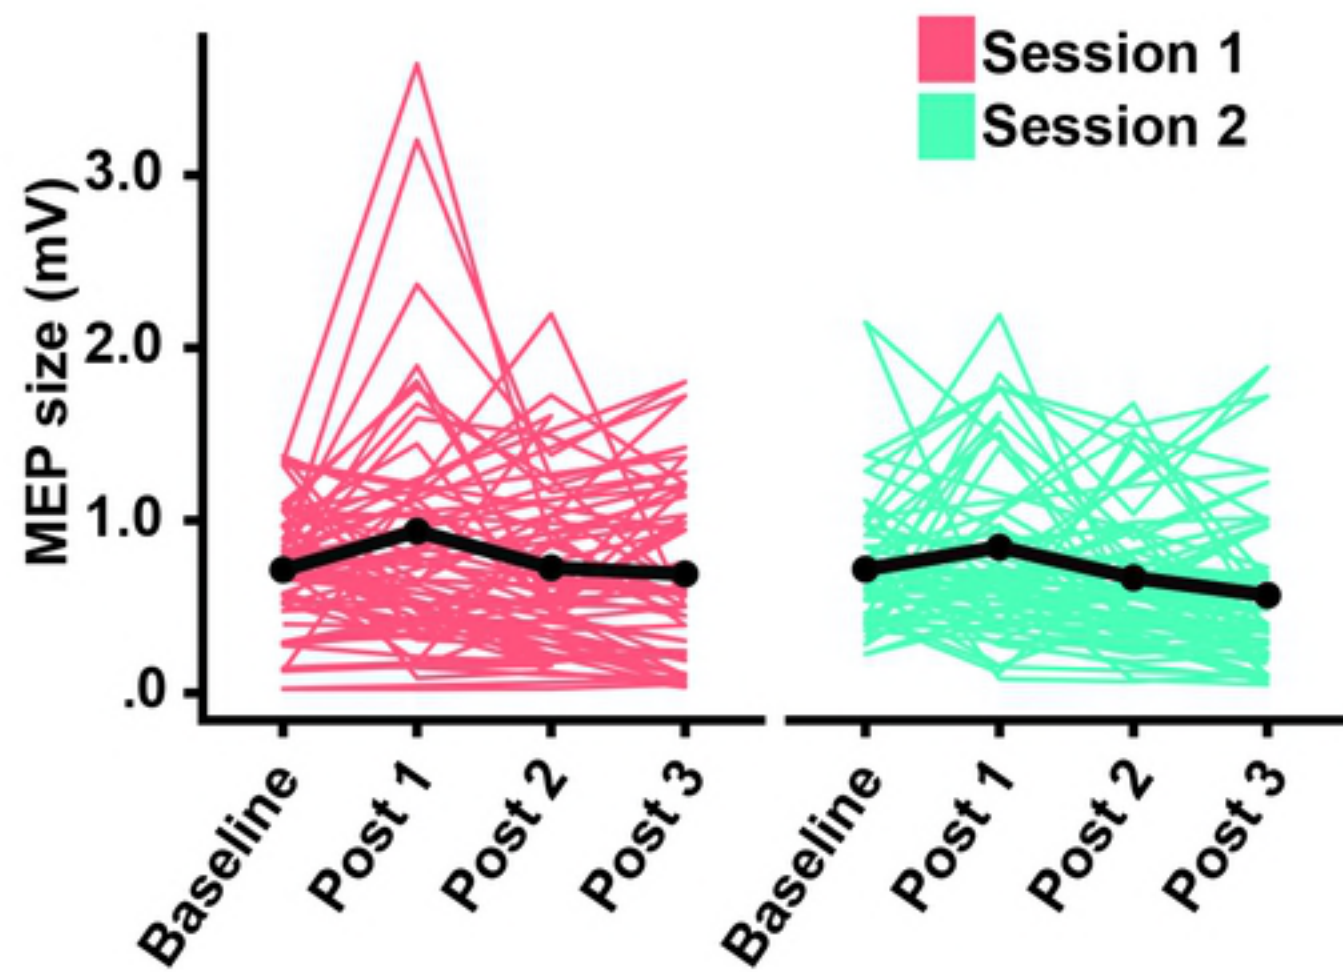**B**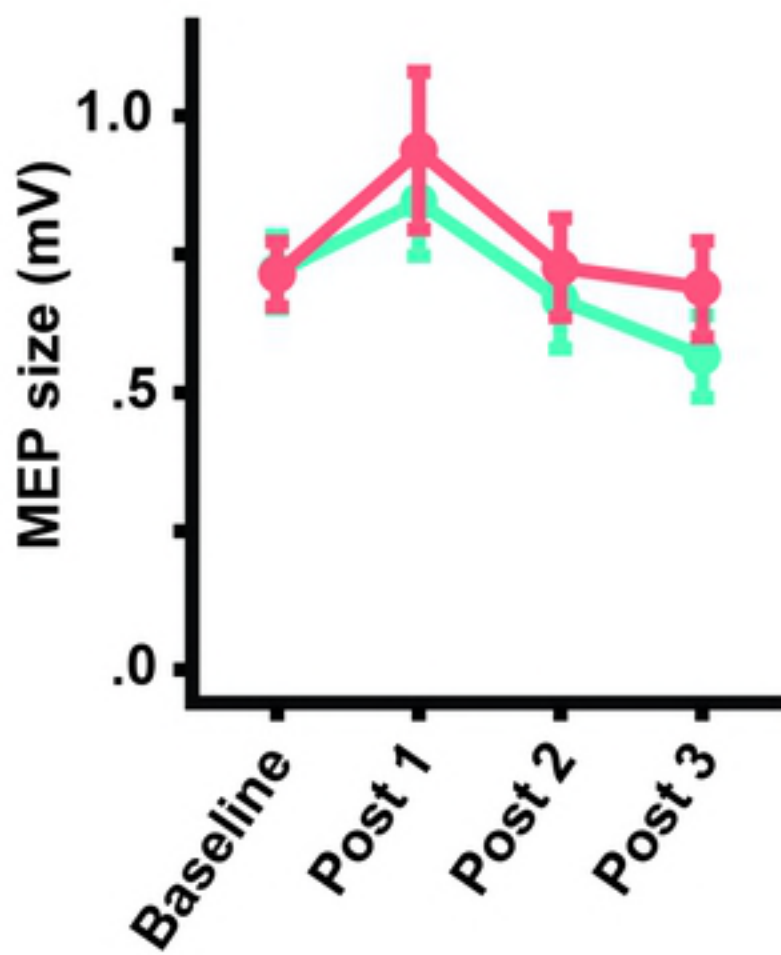**C**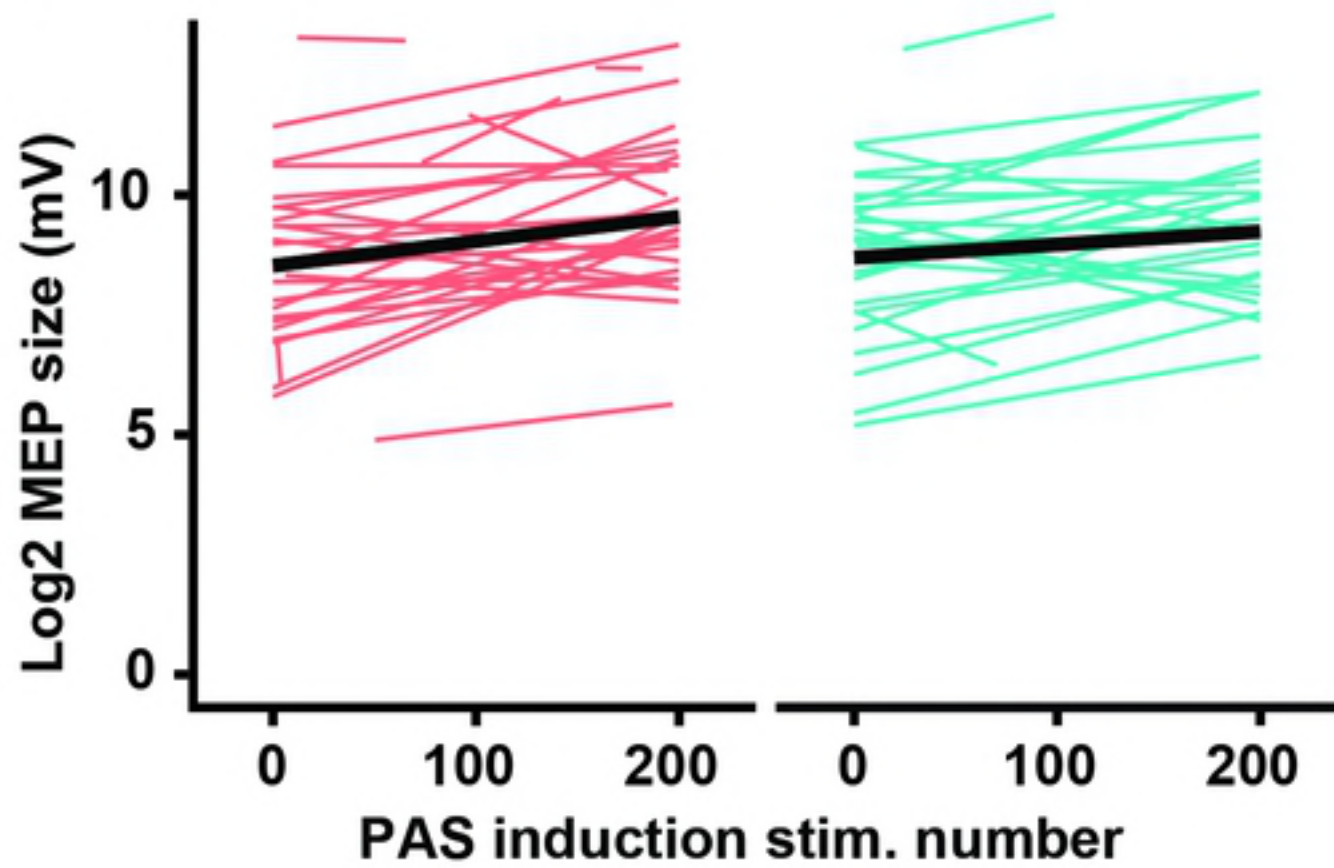**D**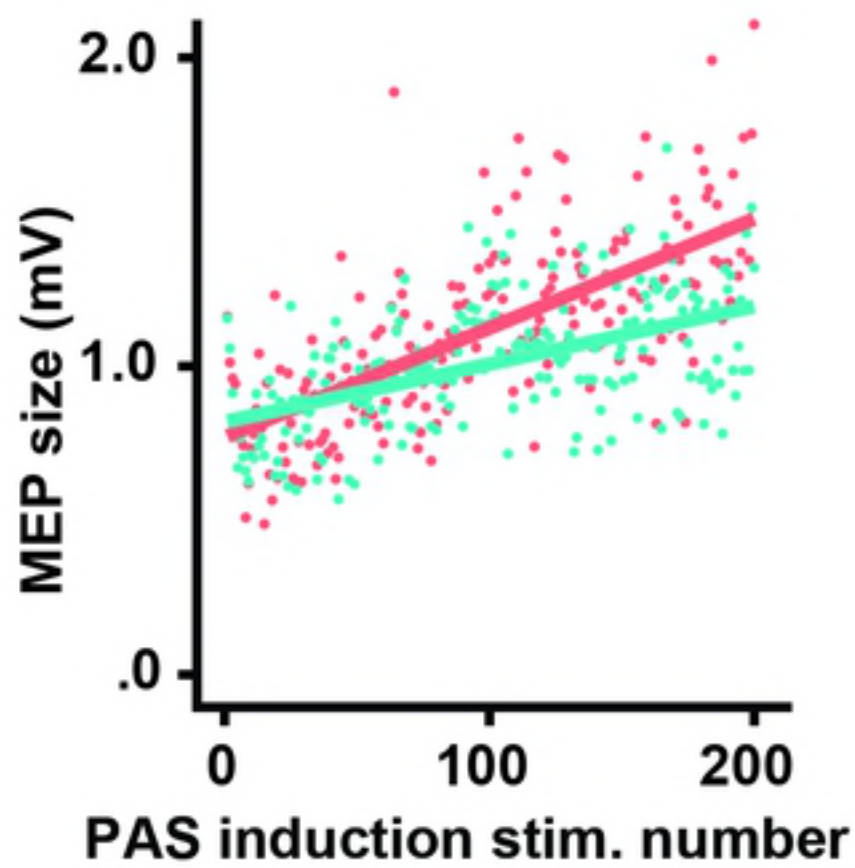

Slope Session 2

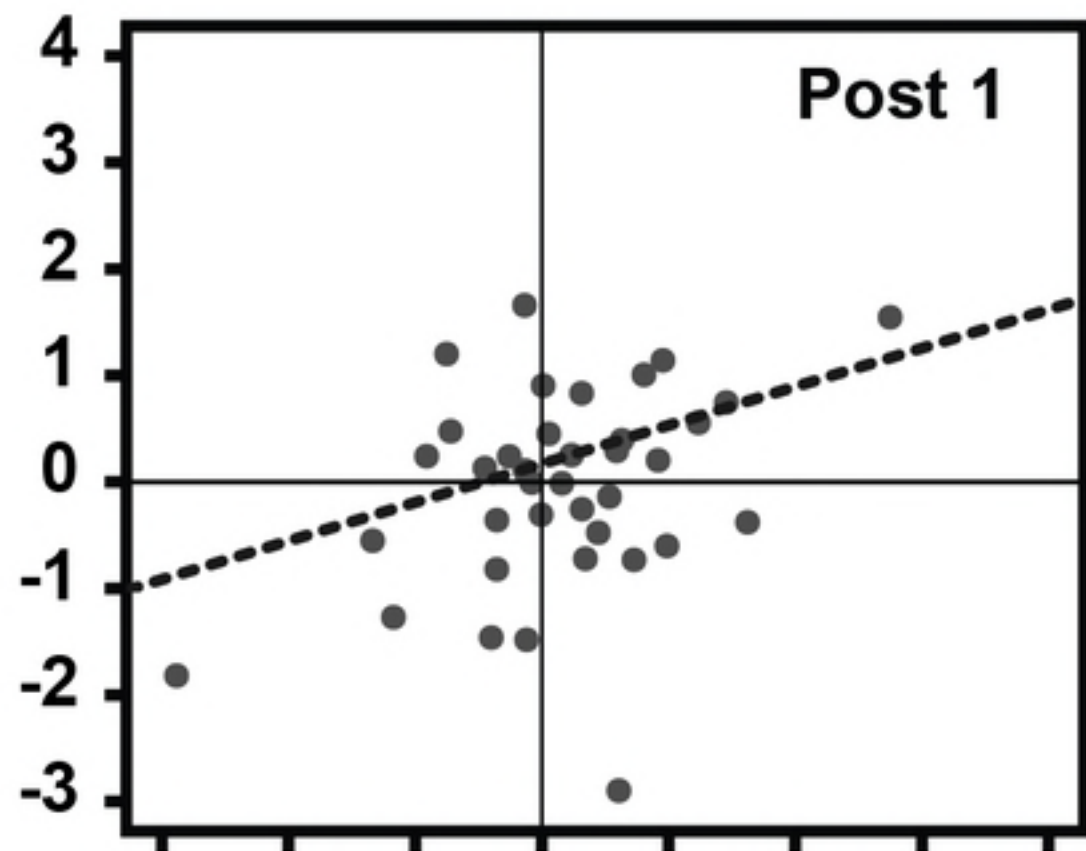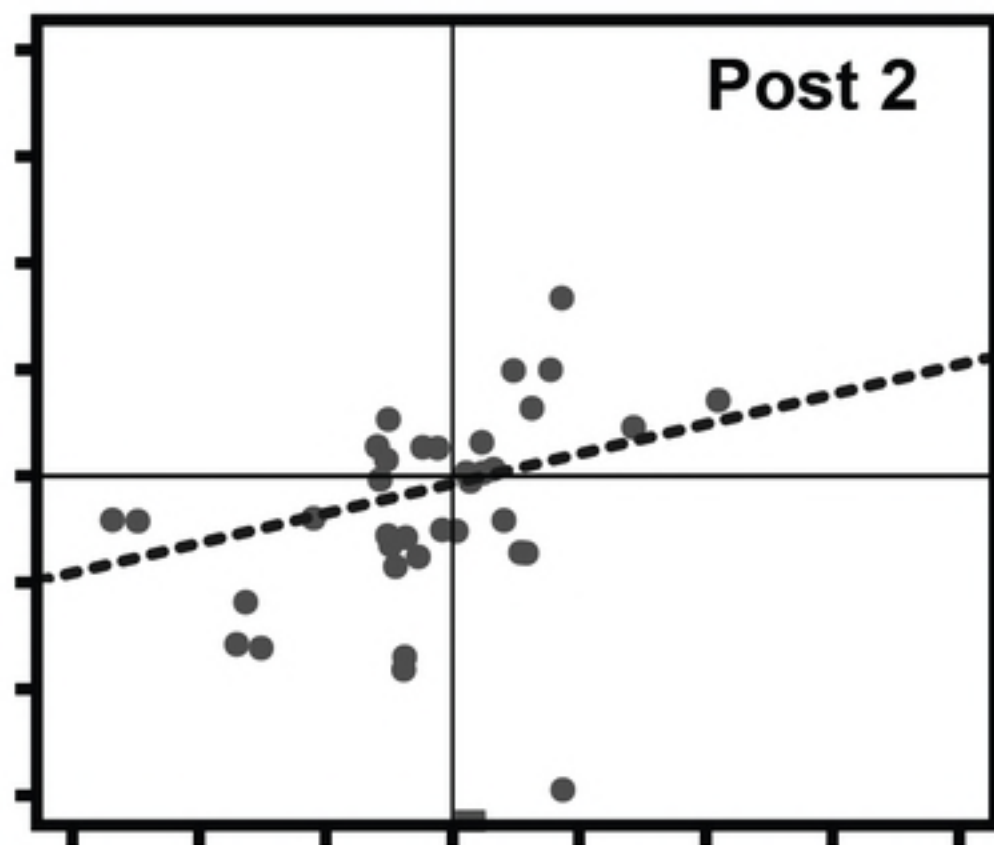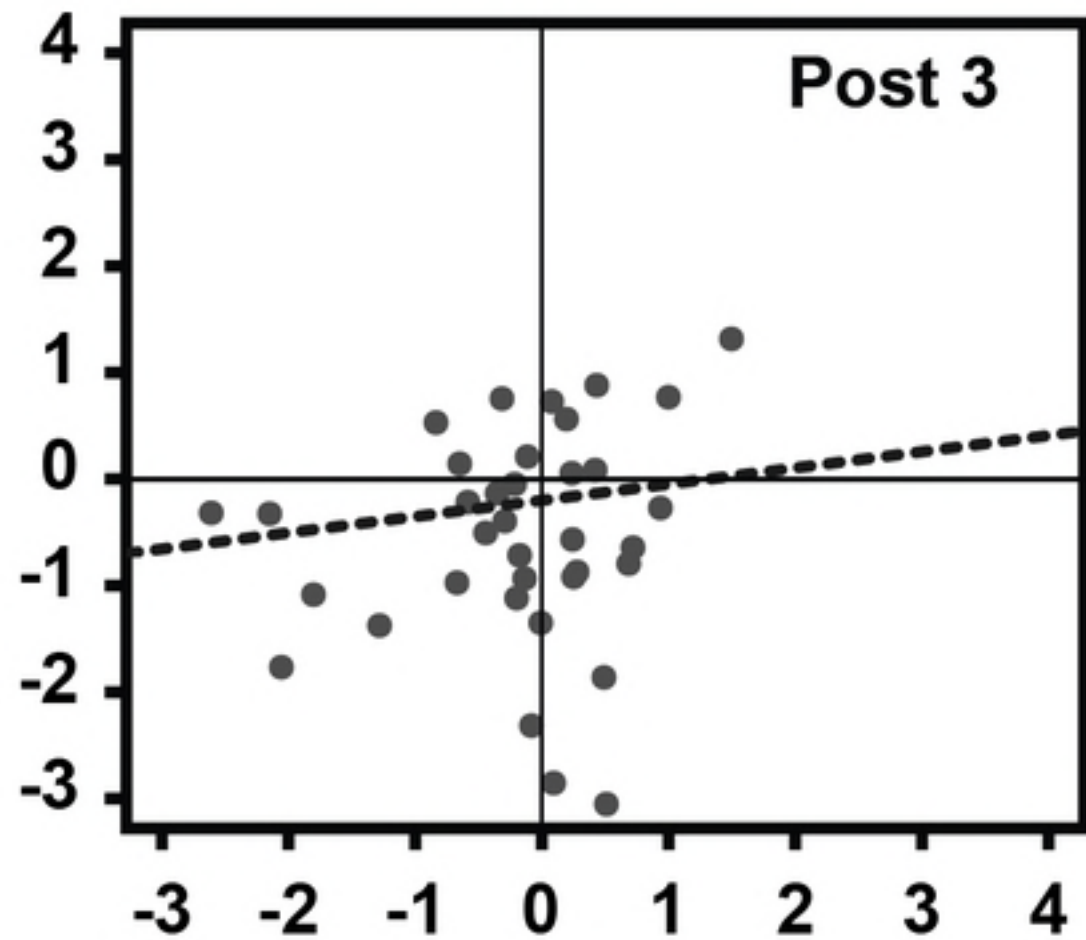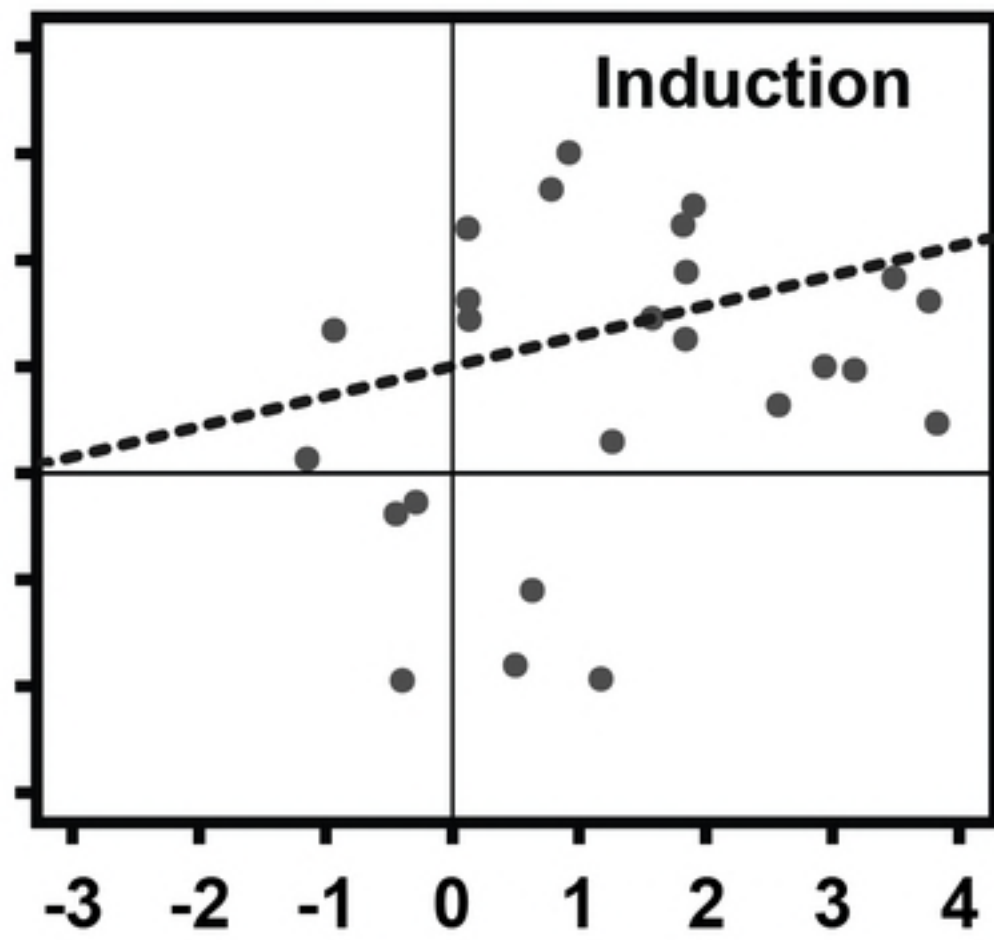

Slope Session 1
